# Supplementary material
Source: PubMed Central journal article supplement (PMC5983149)

## Source data for Figure 6B

No antibiotic

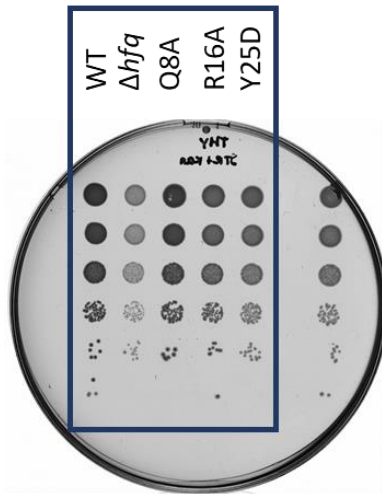

Colistin

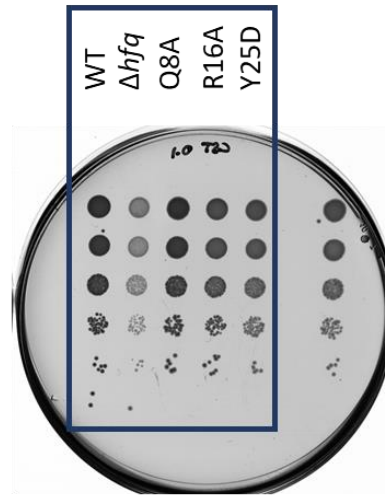

Neomycin

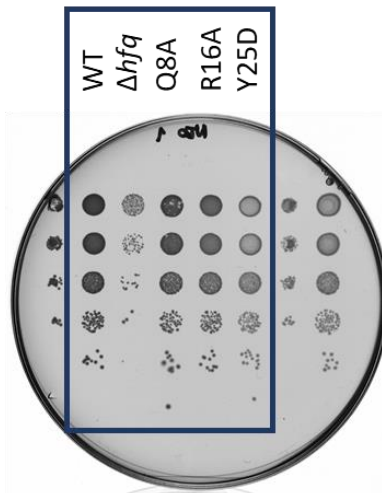

Kanamycin

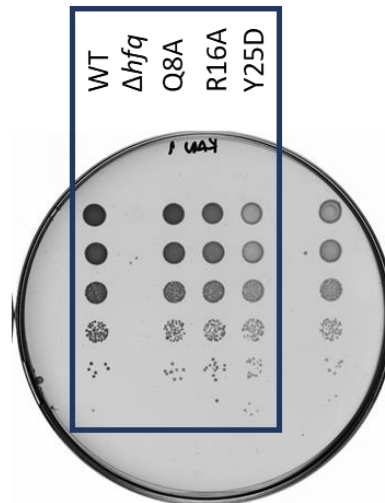

Supplement: EMBJ-37-e97631-s010.pdf [file EMBJ-37-e97631-s010.pdf]
